# Supplementary material for: Effects of G and SH Truncation on the Replication, Virulence, and Immunogenicity of Avian Metapneumovirus
Source: MDPI journal article supplement (doi:10.3390/vaccines12010106), 2024-01-21
Supplement: s1 [file s1]

**Table S1.** Primer set for disease diagnosis.

| No. | Target gene<br>(Protein) | Primer | Forward (5' to 3')        | Reverse (5' to 3')         | Amplicon<br>(bp) | Usage                                      |
|-----|--------------------------|--------|---------------------------|----------------------------|------------------|--------------------------------------------|
| 1   | L                        | aMPV-L | GTTGCCTTGCATGCCATTG       | GCCTGTCAATTGGGTCTTCTAC     | 210              | Viral RNA<br>detection<br>(RT, qRT-PCR)    |
| 2   | N                        | FR1    | ACGAGAAAAAACGCATTCAAGTCAC | GCATTCCCCAAAACAACAC        | 1032             | Full genome<br>sequencing,<br>Gene cloning |
| 3   | P                        | FR2    | CATCTTCATGCAAGCTTATGGAG   | GGCACACCTTGATAGGTATC       | 1374             |                                            |
| 4   | M                        | FR3    | CAAAAATAGGAGATGGGAGTGTG   | GGTTACAGTGCTGCATGATTC      | 1107             |                                            |
| 5   | F                        | FR4    | CTCGGTGCAGGAACACAAG       | CTCCAAATATTGGGAGTTGC       | 1012             |                                            |
| 6   | F, M2-1                  | FR5    | CAGTGCAGGAATAACTTCC       | GTCTCGTGCAGATTTACATCA      | 1363             |                                            |
| 7   | M2-2. SH                 | FR6    | GACCATGTATTGTTAGTGCG      | GTTCTTGGTGCACATACAGTG      | 1196             |                                            |
| 8   | G                        | FR7    | AAACTCTGATGGATGCCTAG      | TTATTGACTAGTACAGCACCAC     | 1510             |                                            |
| 9   | L                        | FR8    | CAGCAAATCAACTCCTCCAG      | GTACCACTTAACAATCATC        | 1575             |                                            |
| 10  | L                        | FR9    | CATCATTTGGCTGCATCTTG      | CATGCCTATAAGTGCATATC       | 1500             |                                            |
| 11  | L                        | FR10   | CTATCTTCAGTGAAAGCTAG      | CTATTGTTGTGACGCAATTC       | 1526             |                                            |
| 12  | L                        | FR11   | GTTATGCAAGATGTAGGGCCTG    | GATTGTGGTGTACATACAGCATC    | 1446             |                                            |
| 13  | L                        | FR12   | CATGGTTCCTGATGAGCTTC      | ACGGCAAAAAAACCGTATTCAATACA | 1803             |                                            |

**Table S2.** Accession number registered in Genbank.

| aMPV strain                             | Accession number |
|-----------------------------------------|------------------|
| SNU21004WT                              | OM249786         |
| SNU21004-V <sub>12</sub>                | OR461284         |
| SNU21004-V <sub>12</sub> E <sub>5</sub> | OR461285         |

**Table S3.** Primer set for the detection of innate immune-related genes.

| Target gene        |   | Sequence (5' -> 3' direction) |
|--------------------|---|-------------------------------|
| IFN- $\alpha$      | F | ATCCTCCAGCACCTCTTCAA          |
|                    | R | AATCGTTGTCGTGGAGGAAG          |
| IFN- $\beta$       | F | CCTCCAACACCTCTTCAACATG        |
|                    | R | TGGCGTGTGCGGTCAAT             |
| IFN- $\gamma$      | F | GTGAAGAAGGTGAAAGATATCATGGA    |
|                    | R | GCTTTGCGCTGGATTCTCA           |
| IL-6               | F | GCTCGCCGGCTTCGA               |
|                    | R | GGTAGGTCTGAAAGGCGAACAG        |
| IL-12              | F | TGGTCCACGCTTTGCAGAT           |
|                    | R | AAGGTTAAGGCGTGGCTTCTTA        |
| IL-18              | F | ACGTGGCAGCTTTTGAAGAT          |
|                    | R | GCGGTGGTTTTGTAACAGTG          |
| GAPDH              | F | CCCAATGTCTCTGTTGTTGAC         |
|                    | R | CAGCCTTCACTACCCTCTTGAT        |
| Mouse <i>Actb</i>  | F | ATT GGCAACGAGCGGTTCC          |
|                    | R | AGCACTGTGTTG GCATAGAGG        |
| Mouse <i>Rig-i</i> | F | GAGAGTCACGGGACCCACT           |
|                    | R | CGGTCTTAGCATCTCCAACG          |
| Mouse <i>Mda5</i>  | F | TGATGCACTATTCCAAGAACTAACA     |
|                    | R | TCTGTGAGACGAGTTAGCCAAG        |
| Mouse <i>Lgp2</i>  | F | CAGCCTAGTCTGCTGCTATTC         |
|                    | R | CCAGAGCAGGTAAGATCACTT         |
| Mouse <i>Mavs</i>  | F | CTGGCTGATCAAGTGACTCG          |
|                    | R | AATGCAGAGGGTCCAGAAAC          |

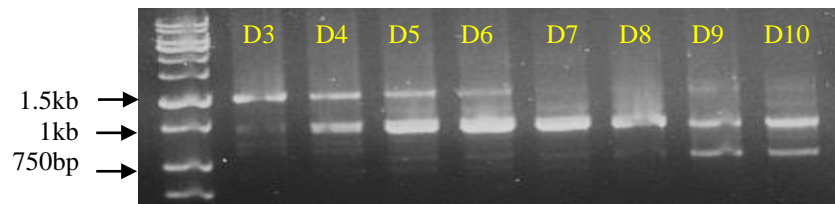

**Figure S1.** During multi-passage, additional deletion of the SH-G occurred in the SNU21004-V<sub>12</sub>D<sub>x</sub> virus.
